# Supplementary material for: Genome-wide survey of the phosphofructokinase family in cassava and functional characterization in response to oxygen-deficient stress
Source: Research Square preprint supplement (doi:10.21203/rs.3.rs-80160/v1), 2020-11-10
Supplement: Supplementary file 1 [file ec4d882986ffe608944baf0d.xlsx]

## Sheet: Sheet1
	Table 1 Characteristics of the MePFK family
Gene Name	Accession NO.	DNA Length（bp）	Protein Length	Molecular Weight	PI	Grand average of hydropathicity	Num of Exon	Predicted localization
MePFK01	Manes.14G038800	5222	527	58275.3	7.6	-0.211	14	Cytosolic
MePFK02	manes.03g029300	4847	542	59802.1	8.36	-0.241	14	Chloroplastic
MePFK03	Manes.16G106600	5713	557	61105.6	7.15	-0.26	13	Chloroplastic
MePFK04	Manes.11G031700	3271	545	59954.9	6.29	-0.278	13	Chloroplastic
MePFK05	Manes.16G076300	5566	481	52794.9	6.41	-0.289	13	Cytosolic
MePFK06	Manes.12G128200	7202	530	58186.7	7.89	-0.081	13	Chloroplastic
MePFK07	Manes.13G098500	10556	536	58917.3	7.62	-0.114	13	Chloroplastic
MePFK08	Manes.09G077800	3436	414	46166.1	8.85	-0.129	4	Cytosolic
MePFK09	Manes.09G085200	2531	499	55190.7	6.74	-0.221	2	Cytosolic
MePFPA1	Manes.05G129500	7660	617	67407.4	6.42	-0.1	19	Cytosolic
MePFPA2	Manes.18G001100	6967	617	67559.5	6.5	-0.128	19	Cytosolic
MePFPB1	Manes.16G002600	5872	566	61675.9	6.15	-0.105	16	Cytosolic
MePFPB2	Manes.17G026900	3917	318	34176.3	6.94	-0.005	8	Cytosolic
